# Supplementary material for: Multidrug resistance plasmids commonly reprogram the expression of metabolic genes in Escherichia coli
Source: PubMed Central journal article supplement (PMC10949484; doi:10.1128/msystems.01193-23), 2024-02-20
Supplement: msystems.01193-23-s0003.pdf [file msystems.01193-23-s0003.pdf]

## Supplementary

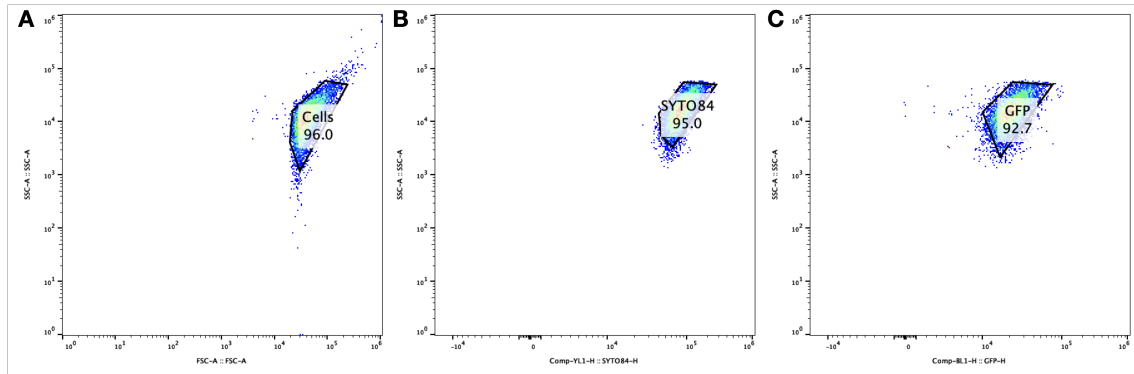

**Fig. S1** Example gating applied to all test populations. **A** All cells, WT population unstained. **B** SYTO<sup>TM</sup>84 stained cells. **C** GFP+ cells. Gating applied so that single (SYTO<sup>TM</sup>84 only, plasmid bearer) and double (SYTO<sup>TM</sup>84 stained plus GFP+ expressing, plasmid-free) labelled cells could be counted.

**Table S1** Competition Index (CI) values for all independent biological replicates.

| Transconjugant | Replicate | CI    | Mean  |
|----------------|-----------|-------|-------|
| 7E2            | 1         | 0.015 | 0.032 |
|                | 2         | 0.036 |       |
|                | 3         | 0.045 |       |
| 13F2           | 1         | 0.054 | 0.082 |
|                | 2         | 0.157 |       |
|                | 3         | 0.034 |       |
| LA84           | 1         | 0.017 | 0.012 |
|                | 2         | 0.005 |       |
|                | 3         | 0.015 |       |
| LA232          | 1         | 0.008 | 0.006 |
|                | 2         | 0.005 |       |
|                | 3         | 0.005 |       |
| LL19           | 1         | 0.006 | 0.005 |
|                | 2         | 0.006 |       |
|                | 3         | 0.004 |       |
| LL34           | 1         | 0.013 | 0.096 |
|                | 2         | 0.210 |       |
|                | 3         | 0.065 |       |
| LL35           | 1         | 0.041 | 0.025 |
|                | 2         | 0.024 |       |
|                | 3         | 0.010 |       |
| LL70           | 1         | 0.015 | 0.007 |
|                | 2         | 0.004 |       |
|                | 3         | 0.003 |       |

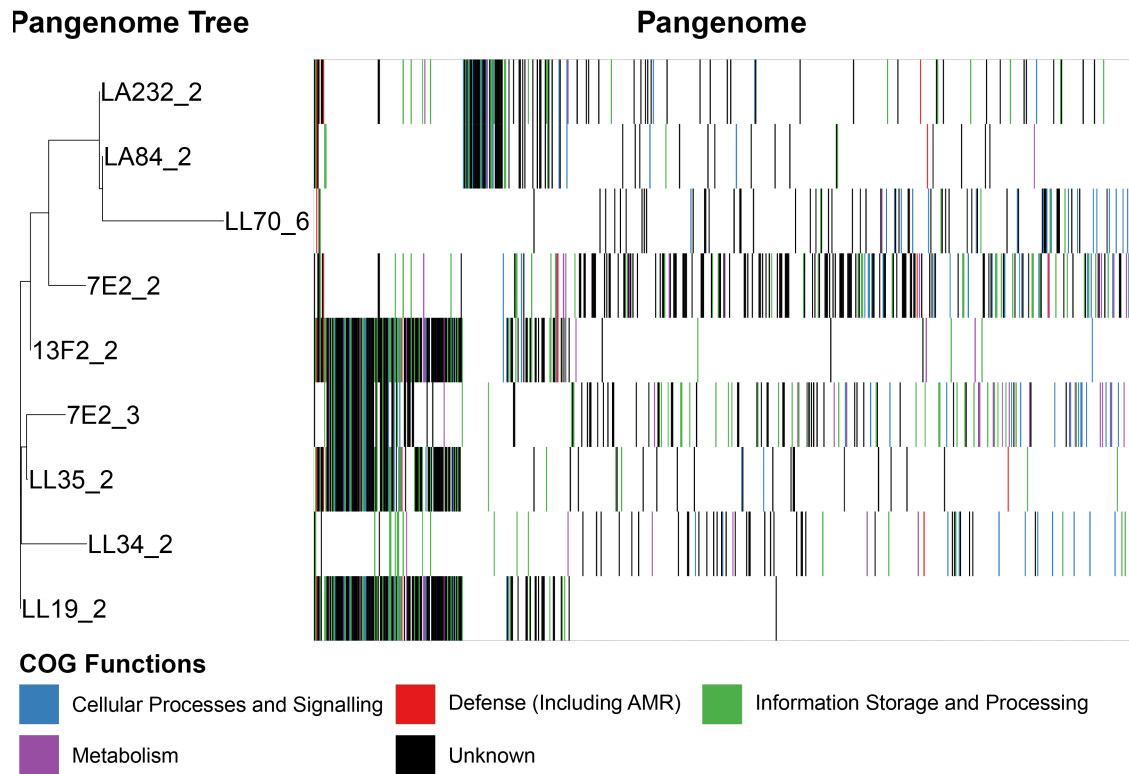

**Fig. S2** Presence and absence of plasmid-encoded genes on the nine conjugated plasmids. Genes coloured by functions as assigned by eggNOG, grouped into categories for simplicity.

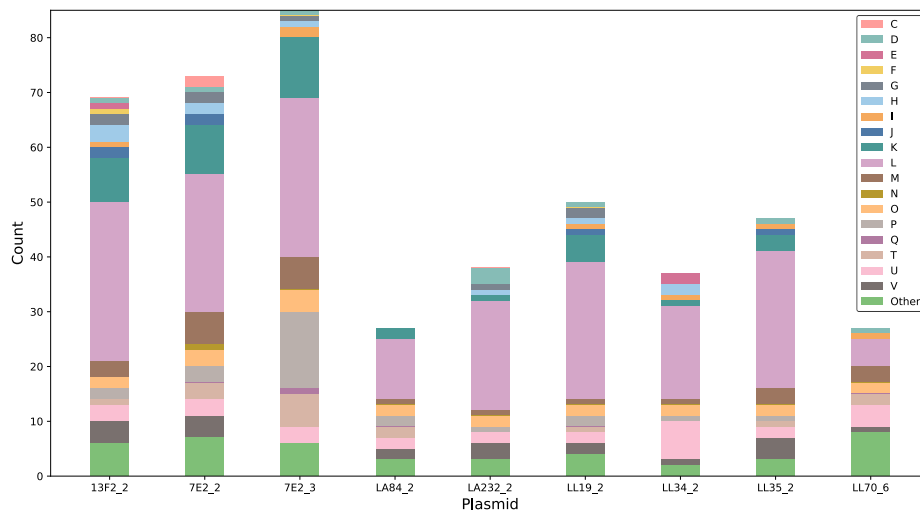

**Fig. S3** COG categories of genes with known function encoded by the conjugative plasmids, as assigned by eggNOG-mapper.

**Table S2** Mutations in transconjugant long read sequences as predicted by breseq. All predicted mutations were deletions. bp = base pair.

| Transconjugant | Position  | Deletion | Annotation           | Gene                                            | Description                                                            |
|----------------|-----------|----------|----------------------|-------------------------------------------------|------------------------------------------------------------------------|
| 7E2            | 3,436,101 | 1 bp     | Coding (152/234 nt)  | <i>ynaE</i> →                                   | Rac prophage; cold shock protein, function unknown                     |
| 13F2           | 3,436,802 | 1 bp     | Coding (303/591 nt)  | <i>pinR</i> →                                   | Rac prophage; predicted site-specific recombinase                      |
| LA84           | None      |          |                      |                                                 |                                                                        |
| LA232          | 660,566   | 1 bp     | Intergenic (-39/+48) | <i>NDAJDAOJ_00649</i> ←/← <i>NDAJDAOJ_00650</i> | tRNA-Glu/16S ribosomal RNA                                             |
| LL19           | 660,566   | 1 bp     | Intergenic (-39/+48) | <i>NDAJDAOJ_00649</i> ←/← <i>NDAJDAOJ_00650</i> | tRNA-Glu/16S ribosomal RNA                                             |
| LL19           | 3,436,802 | 1 bp     | Coding (303/591 nt)  | <i>pinR</i> →                                   | Rac prophage; predicted site-specific recombinase                      |
| LL34           | None      |          |                      |                                                 |                                                                        |
| LL35           | None      |          |                      |                                                 |                                                                        |
| LL70           | 2,682,571 | 1 bp     | Intergenic (+51/+32) | <i>yehA_2</i> →/← <i>rcnB</i>                   | Putative fimbrial protein/periplasmic protein for nickel/cobalt efflux |

**Table S3** Gene Ontology (GO) terms enriched across the differentially expressed from all transconjugants combined.

| Ontology           | GO ID              | Term                                         | Count                              | Expected | Fold enrichment | P value (Fisher) |          |
|--------------------|--------------------|----------------------------------------------|------------------------------------|----------|-----------------|------------------|----------|
| Biological process | GO:0000041         | Transition metal ion transport               | 33                                 | 14.41    | 2.29            | 1.59E-04         |          |
|                    | GO:0006811         | Monoatomic ion transport                     | 74                                 | 41.92    | 1.77            | 2.7E-05          |          |
|                    | GO:0006810         | Transport                                    | 198                                | 136.81   | 1.45            | 8.07E-07         |          |
|                    | GO:0051234         | Establishment of localization                | 199                                | 138.31   | 1.44            | 9.09E-07         |          |
|                    | GO:0051179         | Localization                                 | 200                                | 138.87   | 1.44            | 9.27E-07         |          |
|                    | GO:0034220         | Monoatomic ion transmembrane transport       | 60                                 | 34.25    | 1.75            | 2.03E-04         |          |
|                    | GO:0055085         | Transmembrane transport                      | 182                                | 120.72   | 1.51            | 2.33E-07         |          |
|                    | GO:0009987         | Cellular process                             | 594                                | 539.20   | 1.10            | 1.77E-04         |          |
|                    | GO:0071702         | Organic substance transport                  | 133                                | 90.58    | 1.47            | 4.74E-05         |          |
|                    | UNCLASSIFIED       | Unclassified                                 | 133                                | 184.54   | 0.72            | 4.49E-05         |          |
|                    | GO:0006396         | RNA processing                               | 6                                  | 22.65    | 0.26            | 1.73E-04         |          |
|                    | GO:0043170         | Macromolecule metabolic process              | 136                                | 194.27   | 0.70            | 5.15E-06         |          |
|                    | GO:0006399         | tRNA metabolic process                       | 4                                  | 18.72    | 0.21            | 1.93E-06         |          |
|                    | GO:0034660         | ncRNA metabolic process                      | 6                                  | 26.58    | 0.23            | 9.72E-06         |          |
|                    | GO:0051301         | Cell division                                | 2                                  | 15.16    | 0.13            | 1.83E-04         |          |
|                    | Molecular function | GO:0022857                                   | Transmembrane transporter activity | 159      | 103.50          | 1.54             | 7.48E-07 |
|                    |                    | GO:0005215                                   | Transporter activity               | 159      | 105.00          | 1.51             | 1.49E-06 |
| GO:0140640         |                    | Catalytic activity, acting on a nucleic acid | 27                                 | 56.33    | 0.48            | 4.29E-05         |          |
| Cellular component | GO:1902495         | Transmembrane transporter complex            | 82                                 | 52.97    | 1.55            | 4.50E-04         |          |
|                    | GO:0098796         | Membrane protein complex                     | 98                                 | 63.07    | 1.55            | 1.11E-04         |          |
|                    | GO:0016020         | Membrane                                     | 350                                | 281.86   | 1.24            | 7.08E-06         |          |
|                    | GO:0005886         | Plasma membrane                              | 301                                | 239.94   | 1.25            | 2.92E-05         |          |
|                    | GO:0071944         | Cell periphery                               | 334                                | 261.65   | 1.28            | 1.24E-06         |          |

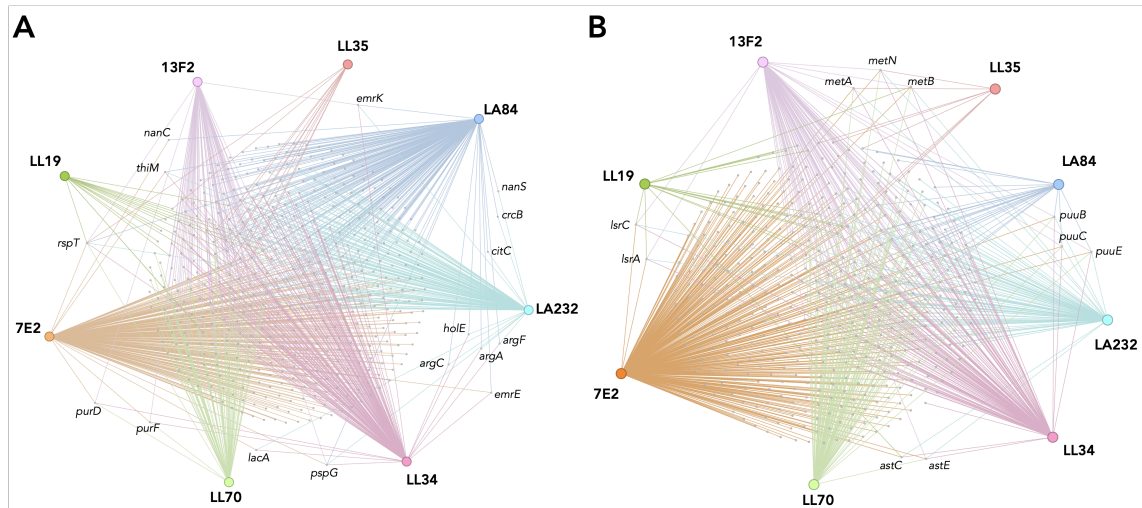

**Fig. S4** Genes of known function that are **A** up- or **B** downregulated in the eight transconjugants. Nodes that depict transconjugants are labelled in bold. Edges connect the transconjugants to their significantly differentially expressed genes. Select genes are highlighted.
